# Supplementary material for: Superiorly Plasticized PVC/PBSA Blends through Crotonic and Acrylic Acid Functionalization of PVC
Source: MDPI journal article supplement (doi:10.3390/polym9030084), 2017-03-01
Supplement: s1 [file s1]

# Supplementary Material: Superiorly Plasticized PVC/PBSA Blends through Crotonic and Acrylic Acid Functionalization of PVC

Arturo Salazar Avalos, Minna Hakkarainen and Karin Odelius

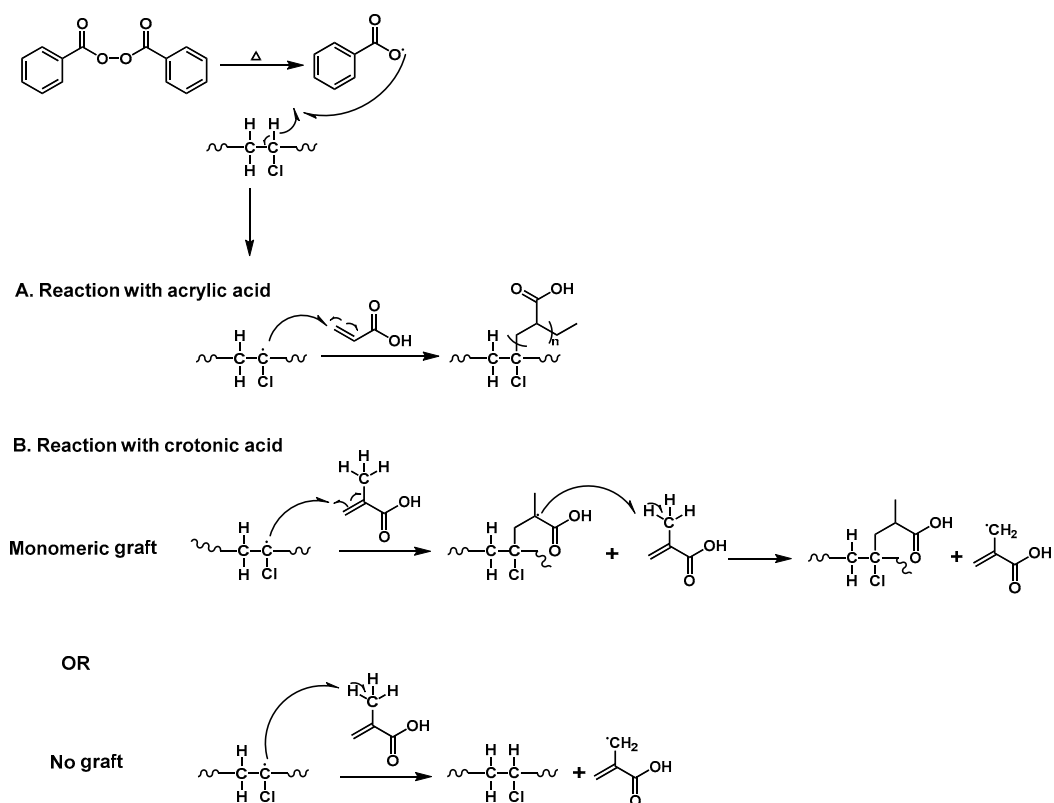

**Scheme S1.** Schematic reaction mechanism for the grafting of acrylic acid or crotonic acid to the main chain of PVC.
